# Supplementary material
Source: Royal Society of Chemistry journal article supplement (doi:10.1039/d6ta00506c)
Supplement: d6ta00506c1.pdf [file d6ta00506c1.pdf]

## Dual-Iron Source Engineering for Optimised Solid-State Reaction Kinetics Towards High-Performance $\text{Na}_4\text{Fe}_3(\text{PO}_4)_2\text{P}_2\text{O}_7$ Cathode

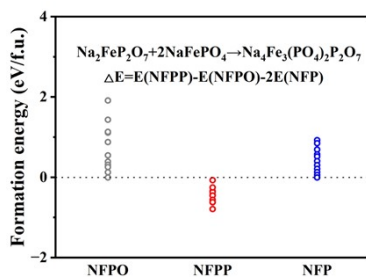

Figure S1. Comparison of the formation energies of NFPP, NFPO and NFP.

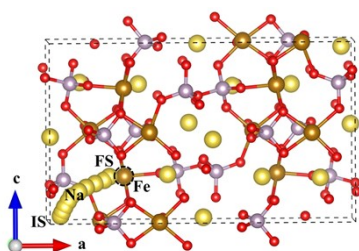

Figure S2. Schematic of  $\text{Na}^+$  migration pathways.

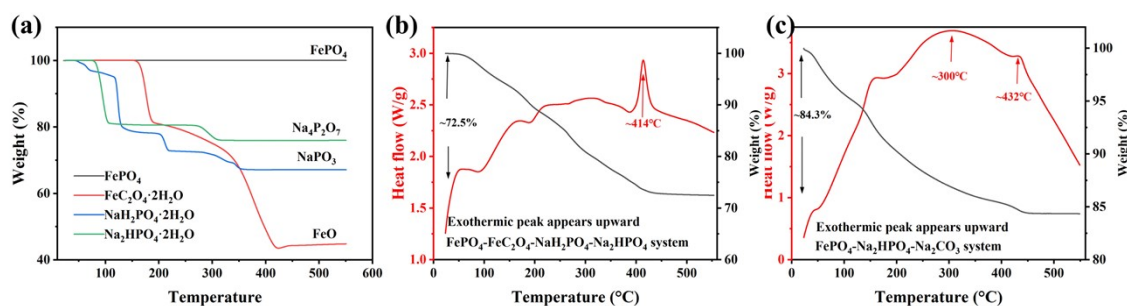

Figure S3. (a) TG curves of the individual starting materials; TG-DSC curves of the precursors during heating: (b) dual-iron-source system; (c) single-iron-source system.

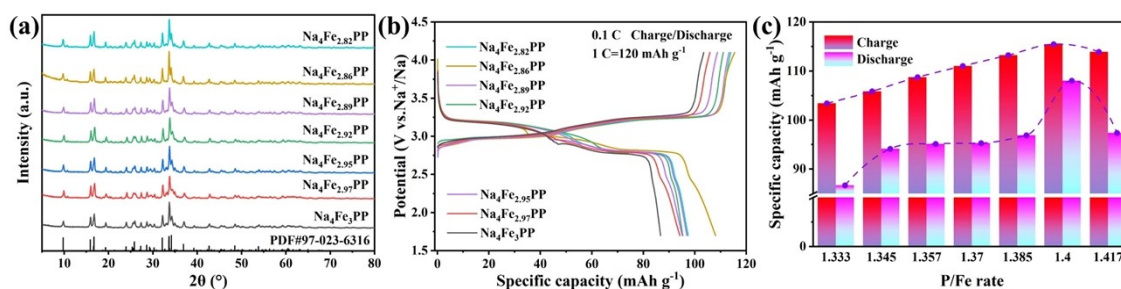

Figure S4. (a) XRD patterns of  $\text{Na}_4\text{Fe}_{3-x}\text{PP}$  ( $x = 0-0.18$ ); (b) Initial charge-discharge curves of the corresponding samples; (c) Variation in charge-discharge capacities.

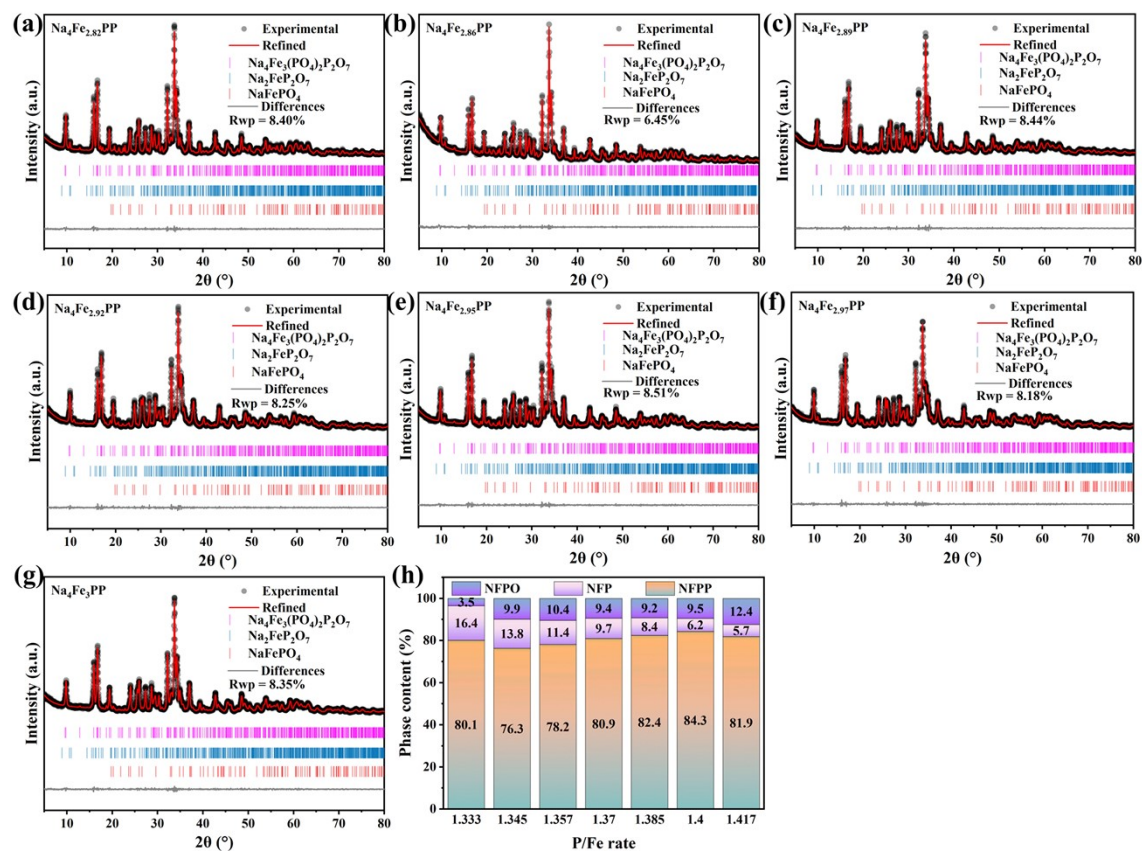

Figure S5. (a-g) Rietveld refinement XRD patterns of Na<sub>4</sub>Fe<sub>3-x</sub>PP (x =0-0.18); (h) Bar chart illustrates the phase composition for each sample.

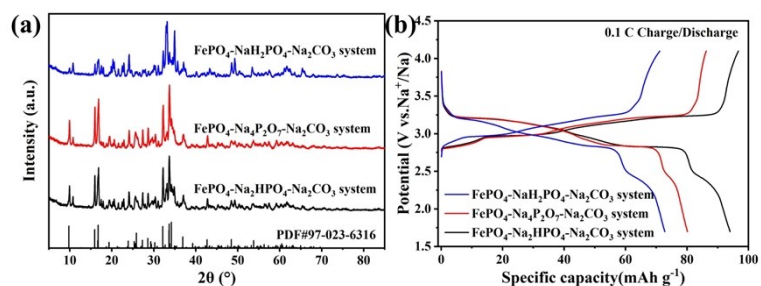

Figure S6. (a) XRD patterns of NFPP samples synthesised using FePO<sub>4</sub> as the sole iron source; (b) Initial charge-discharge curves of the various systems.

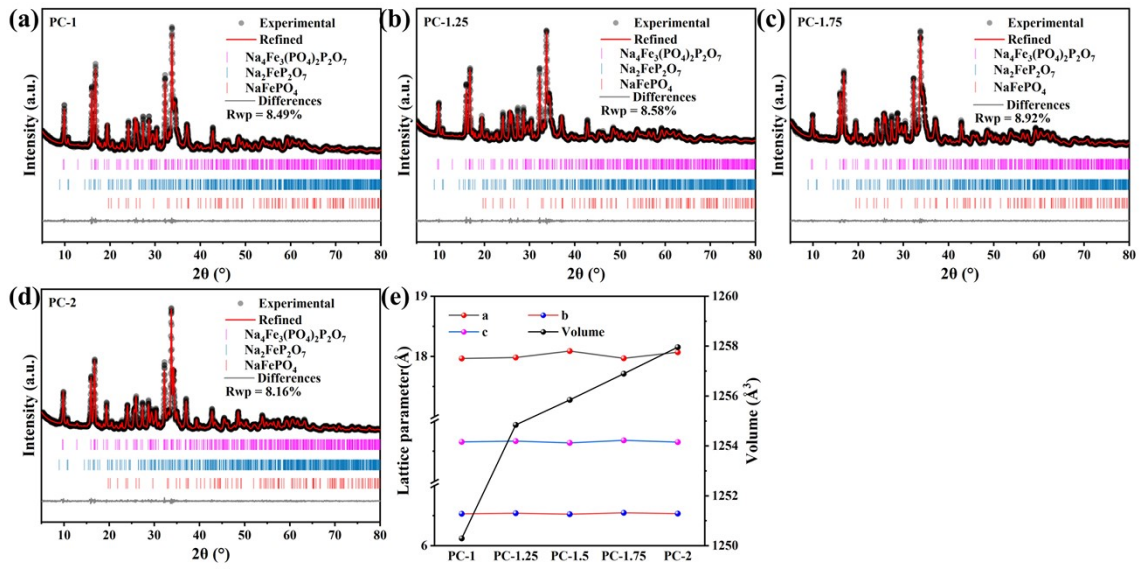

Figure 7. (a-d) Rietveld refinement XRD patterns of PC-y ( $y = 1, 1.25, 1.75,$  and  $2$ ); (e) Variations in lattice parameters and unit-cell volume of PC-y ( $y = 1, 1.25, 1.5, 1.75,$  and  $2$ ).

Table S1. Detailed structural information of the PC-1 sample following Rietveld refinement.

| Formula                           |          | Na <sub>4</sub> Fe <sub>3</sub> (PO <sub>4</sub> ) <sub>2</sub> P <sub>2</sub> O <sub>7</sub> |          |     |      |
|-----------------------------------|----------|-----------------------------------------------------------------------------------------------|----------|-----|------|
| a (Å)                             |          | 17.96723                                                                                      |          |     |      |
| b (Å)                             |          | 6.53067                                                                                       |          |     |      |
| c (Å)                             |          | 10.65551                                                                                      |          |     |      |
| Unitcell volume (Å <sup>3</sup> ) |          | 1250.296                                                                                      |          |     |      |
| Atom                              | x        | y                                                                                             | z        | Occ | Mult |
| Fe1                               | 0.338558 | 0.135247                                                                                      | 0.496501 | 1   | 4    |
| Fe2                               | 0.139985 | 0.582787                                                                                      | 0.491977 | 1   | 4    |
| Fe3                               | 0.255912 | 0.325017                                                                                      | 0.738555 | 1   | 4    |
| P1                                | 0.287058 | 0.592789                                                                                      | 0.504229 | 1   | 4    |
| P2                                | 0.18296  | 0.065706                                                                                      | 0.480516 | 1   | 4    |
| P3                                | 0.56445  | 0.440303                                                                                      | 0.735813 | 1   | 4    |
| P4                                | 0.445642 | 0.128918                                                                                      | 0.72551  | 1   | 4    |
| Na1                               | 0.507194 | 0.875136                                                                                      | 0.956193 | 1   | 4    |
| Na2                               | 0.272013 | 0.80191                                                                                       | 0.734046 | 1   | 4    |
| Na3                               | 0.375595 | 0.366926                                                                                      | 0.250438 | 1   | 4    |
| Na4                               | 0.447462 | 0.662449                                                                                      | 0.590513 | 1   | 4    |
| O1                                | 0.228718 | 0.553108                                                                                      | 0.623639 | 1   | 4    |
| O2                                | 0.333516 | 0.430959                                                                                      | 0.46774  | 1   | 4    |
| O3                                | 0.338766 | 0.803239                                                                                      | 0.536289 | 1   | 4    |
| O4                                | 0.248898 | 0.605642                                                                                      | 0.406926 | 1   | 4    |
| O5                                | 0.244214 | 0.131009                                                                                      | 0.623498 | 1   | 4    |
| O6                                | 0.116546 | 0.913994                                                                                      | 0.510409 | 1   | 4    |
| O7                                | 0.21456  | 0.064836                                                                                      | 0.372994 | 1   | 4    |
| O8                                | 0.145408 | 0.280124                                                                                      | 0.461885 | 1   | 4    |
| O9                                | 0.488224 | 0.318952                                                                                      | 0.703308 | 1   | 4    |
| O10                               | 0.579094 | 0.553158                                                                                      | 0.858391 | 1   | 4    |
| O11                               | 0.62266  | 0.271488                                                                                      | 0.746727 | 1   | 4    |
| O12                               | 0.581711 | 0.606387                                                                                      | 0.62157  | 1   | 4    |
| O13                               | 0.452489 | 0.1132                                                                                        | 0.873315 | 1   | 4    |
| O14                               | 0.373682 | 0.168873                                                                                      | 0.687708 | 1   | 4    |
| O15                               | 0.482857 | 0.014463                                                                                      | 0.666798 | 1   | 4    |

Table S2. Detailed structural information of the PC-1.25 sample following Rietveld refinement.

| Formula                           |          | Na <sub>4</sub> Fe <sub>3</sub> (PO <sub>4</sub> ) <sub>2</sub> P <sub>2</sub> O <sub>7</sub> |          |     |      |
|-----------------------------------|----------|-----------------------------------------------------------------------------------------------|----------|-----|------|
| a (Å)                             |          | 17.98338                                                                                      |          |     |      |
| b (Å)                             |          | 6.54053                                                                                       |          |     |      |
| c (Å)                             |          | 10.66854                                                                                      |          |     |      |
| Unitcell volume (Å <sup>3</sup> ) |          | 1254.844                                                                                      |          |     |      |
| Atom                              | x        | y                                                                                             | z        | Occ | Mult |
| Fe1                               | 0.338408 | 0.134902                                                                                      | 0.493531 | 1   | 4    |
| Fe2                               | 0.140522 | 0.582218                                                                                      | 0.489591 | 1   | 4    |
| Fe3                               | 0.257737 | 0.328423                                                                                      | 0.739785 | 1   | 4    |
| P1                                | 0.288004 | 0.57801                                                                                       | 0.499972 | 1   | 4    |
| P2                                | 0.176262 | 0.07699                                                                                       | 0.48824  | 1   | 4    |
| P3                                | 0.565366 | 0.442595                                                                                      | 0.736033 | 1   | 4    |
| P4                                | 0.446561 | 0.129835                                                                                      | 0.727173 | 1   | 4    |
| Na1                               | 0.505087 | 0.882829                                                                                      | 0.963913 | 1   | 4    |
| Na2                               | 0.273164 | 0.813047                                                                                      | 0.748797 | 1   | 4    |
| Na3                               | 0.378235 | 0.379811                                                                                      | 0.241151 | 1   | 4    |
| Na4                               | 0.454979 | 0.671285                                                                                      | 0.59218  | 1   | 4    |
| O1                                | 0.242385 | 0.552708                                                                                      | 0.626535 | 1   | 4    |
| O2                                | 0.341408 | 0.435937                                                                                      | 0.468161 | 1   | 4    |
| O3                                | 0.325756 | 0.816906                                                                                      | 0.531775 | 1   | 4    |
| O4                                | 0.258731 | 0.631889                                                                                      | 0.402374 | 1   | 4    |
| O5                                | 0.260665 | 0.085728                                                                                      | 0.607616 | 1   | 4    |
| O6                                | 0.117061 | 0.909692                                                                                      | 0.515588 | 1   | 4    |
| O7                                | 0.220559 | 0.052097                                                                                      | 0.371265 | 1   | 4    |
| O8                                | 0.141219 | 0.262074                                                                                      | 0.465412 | 1   | 4    |
| O9                                | 0.478157 | 0.330182                                                                                      | 0.702228 | 1   | 4    |
| O10                               | 0.571135 | 0.563169                                                                                      | 0.860148 | 1   | 4    |
| O11                               | 0.624411 | 0.275334                                                                                      | 0.747518 | 1   | 4    |
| O12                               | 0.588682 | 0.584915                                                                                      | 0.629129 | 1   | 4    |
| O13                               | 0.445768 | 0.105467                                                                                      | 0.875276 | 1   | 4    |
| O14                               | 0.37109  | 0.151613                                                                                      | 0.677863 | 1   | 4    |
| O15                               | 0.485617 | -0.00607                                                                                      | 0.660765 | 1   | 4    |

Table S3. Detailed structural information of the PC-1.5 sample following Rietveld refinement.

| Formula                           |          |          |          | Na <sub>4</sub> Fe <sub>3</sub> (PO <sub>4</sub> ) <sub>2</sub> P <sub>2</sub> O <sub>7</sub> |      |
|-----------------------------------|----------|----------|----------|-----------------------------------------------------------------------------------------------|------|
| a (Å)                             |          |          |          | 18.09069                                                                                      |      |
| b (Å)                             |          |          |          | 6.52558                                                                                       |      |
| c (Å)                             |          |          |          | 10.63811                                                                                      |      |
| Unitcell volume (Å <sup>3</sup> ) |          |          |          | 1255.851                                                                                      |      |
| Atom                              | x        | y        | z        | Occ                                                                                           | Mult |
| Fe1                               | 0.337342 | 0.132051 | 0.491971 | 1                                                                                             | 4    |
| Fe2                               | 0.141712 | 0.582557 | 0.489598 | 1                                                                                             | 4    |
| Fe3                               | 0.253679 | 0.32992  | 0.737456 | 1                                                                                             | 4    |
| P1                                | 0.291359 | 0.581282 | 0.502773 | 1                                                                                             | 4    |
| P2                                | 0.179739 | 0.083651 | 0.48747  | 1                                                                                             | 4    |
| P3                                | 0.568658 | 0.441907 | 0.736094 | 1                                                                                             | 4    |
| P4                                | 0.450784 | 0.13561  | 0.728903 | 1                                                                                             | 4    |
| Na1                               | 0.508773 | 0.861268 | 0.967738 | 1                                                                                             | 4    |
| Na2                               | 0.275334 | 0.811068 | 0.739267 | 1                                                                                             | 4    |
| Na3                               | 0.378532 | 0.377324 | 0.235822 | 1                                                                                             | 4    |
| Na4                               | 0.45542  | 0.679931 | 0.585203 | 1                                                                                             | 4    |
| O1                                | 0.232465 | 0.551878 | 0.606251 | 1                                                                                             | 4    |
| O2                                | 0.339473 | 0.413751 | 0.476775 | 1                                                                                             | 4    |
| O3                                | 0.341517 | 0.77497  | 0.541662 | 1                                                                                             | 4    |
| O4                                | 0.241336 | 0.610932 | 0.386261 | 1                                                                                             | 4    |
| O5                                | 0.237087 | 0.10479  | 0.607273 | 1                                                                                             | 4    |
| O6                                | 0.123372 | 0.899711 | 0.513086 | 1                                                                                             | 4    |
| O7                                | 0.227263 | 0.047284 | 0.37826  | 1                                                                                             | 4    |
| O8                                | 0.135355 | 0.276023 | 0.452458 | 1                                                                                             | 4    |
| O9                                | 0.493641 | 0.3286   | 0.690118 | 1                                                                                             | 4    |
| O10                               | 0.559377 | 0.549755 | 0.859606 | 1                                                                                             | 4    |
| O11                               | 0.623527 | 0.265344 | 0.747974 | 1                                                                                             | 4    |
| O12                               | 0.58556  | 0.583347 | 0.636922 | 1                                                                                             | 4    |
| O13                               | 0.454765 | 0.102367 | 0.880183 | 1                                                                                             | 4    |
| O14                               | 0.367556 | 0.151413 | 0.684146 | 1                                                                                             | 4    |
| O15                               | 0.484669 | 0.006811 | 0.650364 | 1                                                                                             | 4    |

Table S4. Detailed structural information of the PC-1.75 sample following Rietveld refinement.

| Formula                           |          |          |          | Na <sub>4</sub> Fe <sub>3</sub> (PO <sub>4</sub> ) <sub>2</sub> P <sub>2</sub> O <sub>7</sub> |      |
|-----------------------------------|----------|----------|----------|-----------------------------------------------------------------------------------------------|------|
| a (Å)                             |          |          |          | 17.97057                                                                                      |      |
| b (Å)                             |          |          |          | 6.54799                                                                                       |      |
| c (Å)                             |          |          |          | 10.68143                                                                                      |      |
| Unitcell volume (Å <sup>3</sup> ) |          |          |          | 1256.897                                                                                      |      |
| Atom                              | x        | y        | z        | Occ                                                                                           | Mult |
| Fe1                               | 0.338577 | 0.135242 | 0.493949 | 1                                                                                             | 4    |
| Fe2                               | 0.139475 | 0.578737 | 0.491661 | 1                                                                                             | 4    |
| Fe3                               | 0.254922 | 0.333694 | 0.735279 | 1                                                                                             | 4    |
| P1                                | 0.289215 | 0.590645 | 0.507876 | 1                                                                                             | 4    |
| P2                                | 0.179977 | 0.07997  | 0.489819 | 1                                                                                             | 4    |
| P3                                | 0.568984 | 0.440561 | 0.735496 | 1                                                                                             | 4    |
| P4                                | 0.449487 | 0.132238 | 0.725166 | 1                                                                                             | 4    |
| Na1                               | 0.505305 | 0.878237 | 0.964902 | 1                                                                                             | 4    |
| Na2                               | 0.271634 | 0.808423 | 0.740135 | 1                                                                                             | 4    |
| Na3                               | 0.376224 | 0.367969 | 0.24035  | 1                                                                                             | 4    |
| Na4                               | 0.45439  | 0.677562 | 0.590472 | 1                                                                                             | 4    |
| O1                                | 0.233752 | 0.557817 | 0.623535 | 1                                                                                             | 4    |
| O2                                | 0.337806 | 0.411147 | 0.477187 | 1                                                                                             | 4    |
| O3                                | 0.337207 | 0.7917   | 0.54815  | 1                                                                                             | 4    |
| O4                                | 0.248632 | 0.638114 | 0.383405 | 1                                                                                             | 4    |
| O5                                | 0.242883 | 0.109674 | 0.593955 | 1                                                                                             | 4    |
| O6                                | 0.120759 | 0.908133 | 0.516655 | 1                                                                                             | 4    |
| O7                                | 0.227317 | 0.061572 | 0.373263 | 1                                                                                             | 4    |
| O8                                | 0.134083 | 0.28204  | 0.45779  | 1                                                                                             | 4    |
| O9                                | 0.490561 | 0.34595  | 0.694129 | 1                                                                                             | 4    |
| O10                               | 0.56083  | 0.540673 | 0.851071 | 1                                                                                             | 4    |
| O11                               | 0.62478  | 0.272006 | 0.751795 | 1                                                                                             | 4    |
| O12                               | 0.588448 | 0.601139 | 0.622562 | 1                                                                                             | 4    |
| O13                               | 0.454301 | 0.109973 | 0.869103 | 1                                                                                             | 4    |
| O14                               | 0.375911 | 0.153449 | 0.685608 | 1                                                                                             | 4    |
| O15                               | 0.493559 | 0.004846 | 0.650535 | 1                                                                                             | 4    |

Table S5. Detailed structural information of the PC-2 sample following Rietveld refinement.

| Formula                           |          |          |          | Na <sub>4</sub> Fe <sub>3</sub> (PO <sub>4</sub> ) <sub>2</sub> P <sub>2</sub> O <sub>7</sub> |      |
|-----------------------------------|----------|----------|----------|-----------------------------------------------------------------------------------------------|------|
| a (Å)                             |          |          |          | 18.0708                                                                                       |      |
| b (Å)                             |          |          |          | 6.53523                                                                                       |      |
| c (Å)                             |          |          |          | 10.65195                                                                                      |      |
| Unitcell volume (Å <sup>3</sup> ) |          |          |          | 1257.962                                                                                      |      |
| Atom                              | x        | y        | z        | Occ                                                                                           | Mult |
| Fe1                               | 0.337485 | 0.134745 | 0.491444 | 1                                                                                             | 4    |
| Fe2                               | 0.139918 | 0.582448 | 0.49006  | 1                                                                                             | 4    |
| Fe3                               | 0.254871 | 0.325816 | 0.738975 | 1                                                                                             | 4    |
| P1                                | 0.29087  | 0.58396  | 0.505753 | 1                                                                                             | 4    |
| P2                                | 0.179339 | 0.072119 | 0.486515 | 1                                                                                             | 4    |
| P3                                | 0.570207 | 0.445721 | 0.736257 | 1                                                                                             | 4    |
| P4                                | 0.449492 | 0.136347 | 0.72692  | 1                                                                                             | 4    |
| Na1                               | 0.506507 | 0.871786 | 0.966831 | 1                                                                                             | 4    |
| Na2                               | 0.272547 | 0.804595 | 0.744289 | 1                                                                                             | 4    |
| Na3                               | 0.378759 | 0.364586 | 0.235802 | 1                                                                                             | 4    |
| Na4                               | 0.453335 | 0.67983  | 0.589013 | 1                                                                                             | 4    |
| O1                                | 0.233137 | 0.556644 | 0.617385 | 1                                                                                             | 4    |
| O2                                | 0.334276 | 0.427204 | 0.466666 | 1                                                                                             | 4    |
| O3                                | 0.340179 | 0.797834 | 0.533764 | 1                                                                                             | 4    |
| O4                                | 0.243081 | 0.62588  | 0.394101 | 1                                                                                             | 4    |
| O5                                | 0.238849 | 0.113655 | 0.610383 | 1                                                                                             | 4    |
| O6                                | 0.124866 | 0.910027 | 0.513879 | 1                                                                                             | 4    |
| O7                                | 0.225379 | 0.048939 | 0.37714  | 1                                                                                             | 4    |
| O8                                | 0.135909 | 0.281474 | 0.45485  | 1                                                                                             | 4    |
| O9                                | 0.486545 | 0.337931 | 0.694203 | 1                                                                                             | 4    |
| O10                               | 0.561841 | 0.555101 | 0.864185 | 1                                                                                             | 4    |
| O11                               | 0.627481 | 0.271279 | 0.747559 | 1                                                                                             | 4    |
| O12                               | 0.587564 | 0.588407 | 0.625424 | 1                                                                                             | 4    |
| O13                               | 0.458846 | 0.107486 | 0.875379 | 1                                                                                             | 4    |
| O14                               | 0.370679 | 0.155415 | 0.684729 | 1                                                                                             | 4    |
| O15                               | 0.48611  | 0.003478 | 0.657139 | 1                                                                                             | 4    |

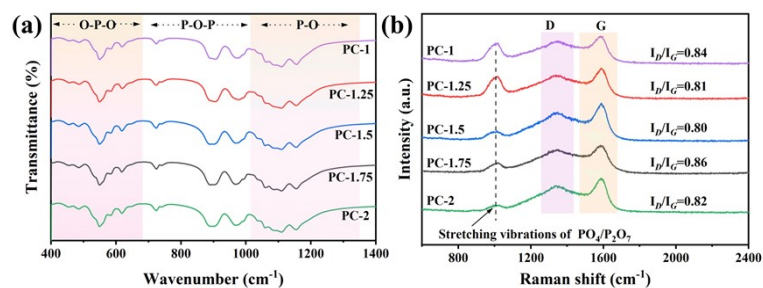

Figure S8. (a) FTIR spectra and (b) Raman spectra of PC-y ( $y = 1, 1.25, 1.5, 1.75,$  and 2).

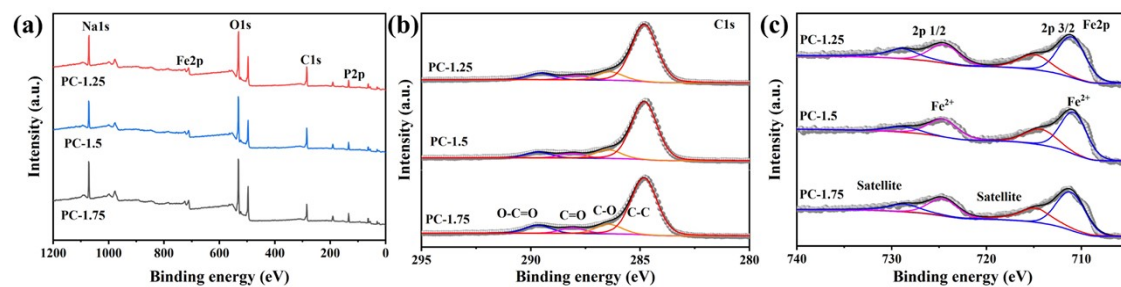

Figure S9. (a) XPS survey spectra of PC-y ( $y = 1.25, 1.5,$  and 1.75); (b) High-resolution C 1s spectra of PC-y ( $y = 1.25, 1.5,$  and 1.75); (c) high-resolution Fe 2p spectra of PC-y ( $y = 1.25, 1.5,$  and 1.75).

Table S6. Carbon content of PC-y (y = 1, 1.25, 1.5, 1.75, and 2) samples determined by a carbon-sulphur Analyser.

| Sample  | C      |
|---------|--------|
| PC-2    | 2.273% |
| PC-1.75 | 2.287% |
| PC-1.5  | 2.292% |
| PC-1.25 | 2.308% |
| PC-1    | 2.315% |

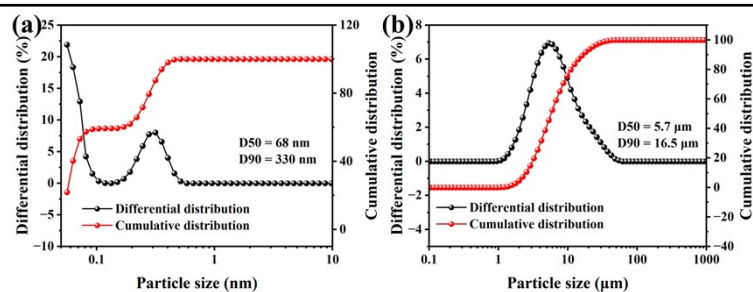

Figure S10. (a) Particle size distribution of the PC-1.5 precursor slurry measured by laser diffraction; (b) particle size distribution of the NFPP measured by laser diffraction.

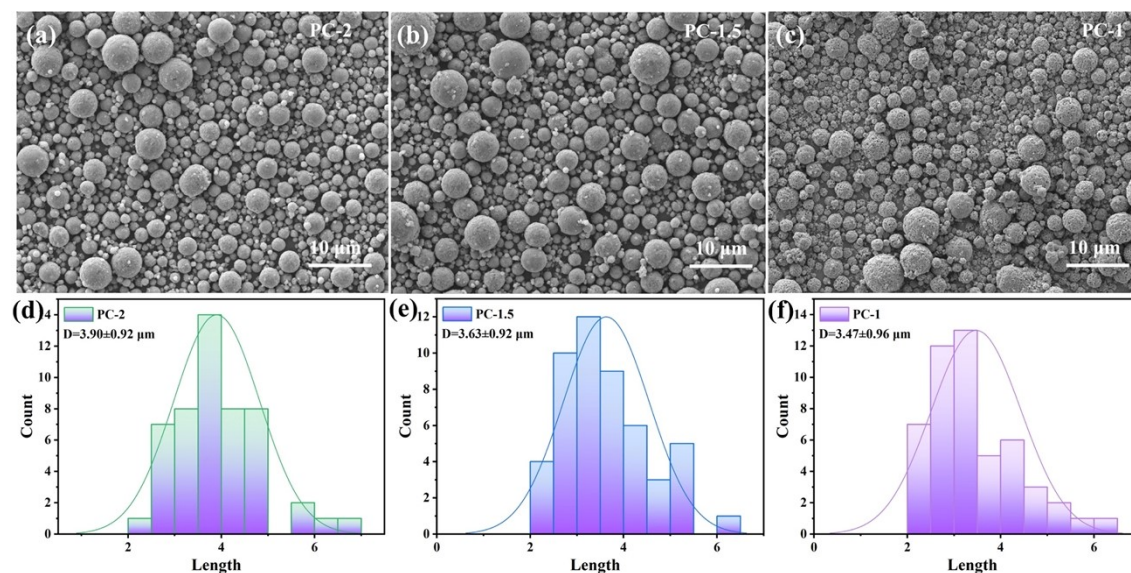

Figure S11. (a- c) SEM images of the PC-y (y = 2, 1.5, and 1); (d-f) Microscopic particle size distributions of PC-y (y = 2, 1.5, and 1).

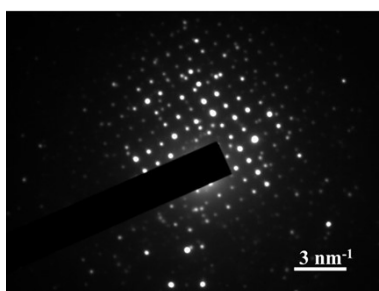

Figure S12. SAED image of PC-1.5.

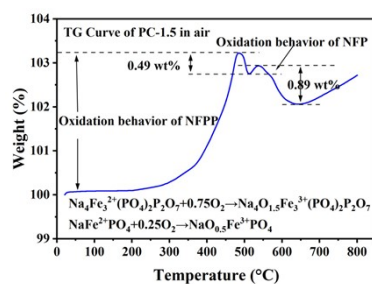

Figure S13. TG curve of the PC-1.5 sample measured in air.

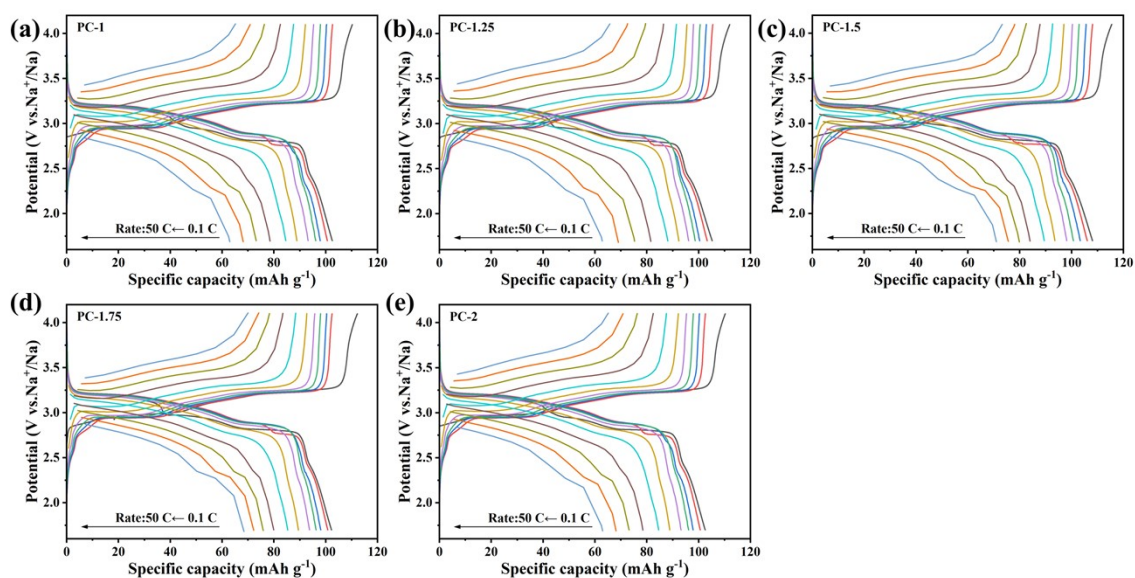

Figure S14. Galvanostatic charge-discharge curves of PC-y ( $y = 1, 1.25, 1.5, 1.75$  and  $2$ ) at various current densities.

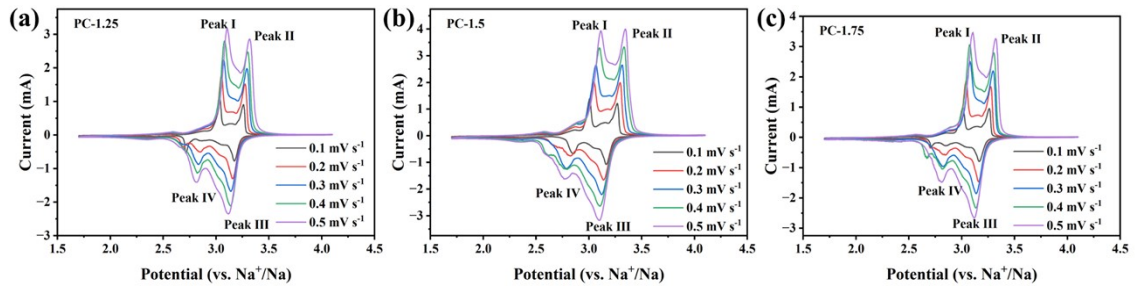

Figure S15. (a-c) CV curves of PC-y ( $y = 1.25, 1.5, \text{ and } 1.75$ ) at scan rates ranging from  $0.1$  to  $0.5 \text{ mV} \cdot \text{s}^{-1}$ .

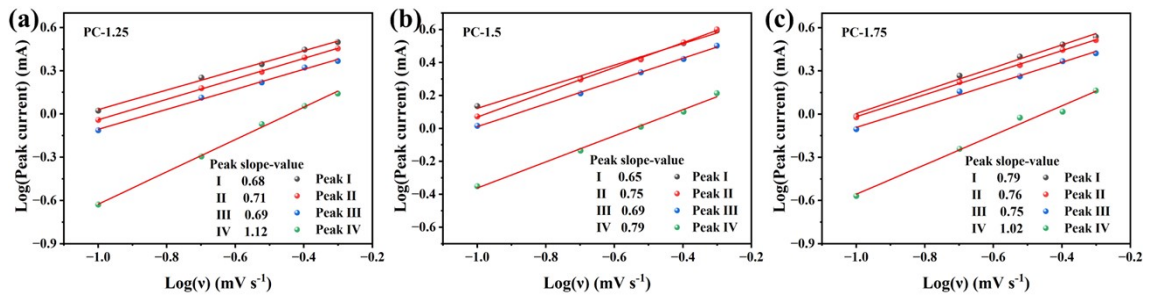

Figure S16. (a-c) The relationship between peak current and the logarithm of the scan rate for PC-y ( $y = 1.25, 1.5, \text{ and } 1.75$ ).

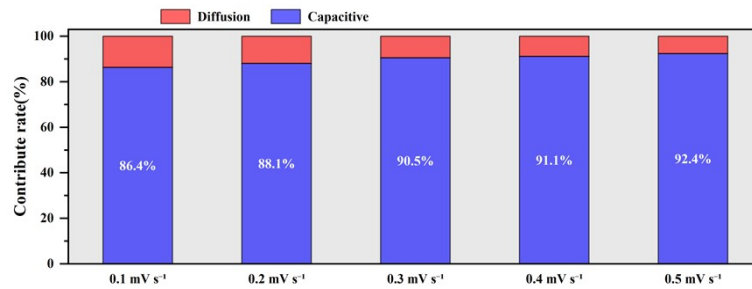

Figure S17. Calculated capacitive contributions at different scan rates.

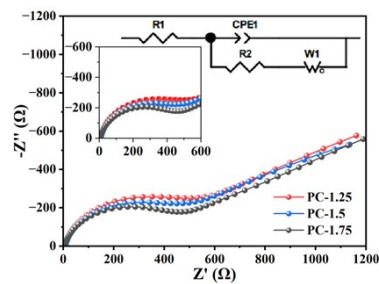

Figure S18. EIS of PC-y ( $y = 1.25, 1.5, \text{ and } 1.75$ ).

Table S7. A comparison of the electrochemical performance of NFPP cathodes.

| Name                                                                                                                                                                      | areal loading<br>(mg cm <sup>-2</sup> ) | Rate performance                  | Capacity retention rate/%   |
|---------------------------------------------------------------------------------------------------------------------------------------------------------------------------|-----------------------------------------|-----------------------------------|-----------------------------|
| Na <sub>4</sub> Fe <sub>2.91</sub> Co <sub>0.09</sub> (PO <sub>4</sub> ) <sub>2</sub> P <sub>2</sub> O <sub>7</sub> <sup>1</sup>                                          | /                                       | 98.5 mAh·g <sup>-1</sup> at 5 C   | 80 (6000 cycles) at 20 C    |
| Na <sub>4</sub> Fe <sub>3</sub> (PO <sub>4</sub> ) <sub>2</sub> P <sub>2</sub> O <sub>7</sub> <sup>2</sup>                                                                | /                                       | 64 mAh·g <sup>-1</sup> at 20 C    | 79.6 (10000 cycles) at 10 C |
| Na <sub>4</sub> Fe <sub>2.4</sub> Ni <sub>0.6</sub> (PO <sub>4</sub> ) <sub>2</sub> P <sub>2</sub> O <sub>7</sub> <sup>3</sup>                                            | ~ 1.6                                   | 86.4 mAh·g <sup>-1</sup> at 25 C  | 72.9 (5000 cycles) at 20 C  |
| Na <sub>4</sub> Fe <sub>3</sub> (PO <sub>4</sub> ) <sub>2</sub> P <sub>2</sub> O <sub>7</sub> <sup>—</sup>                                                                | 1.2~ 1.4                                | 60.2 mAh·g <sup>-1</sup> at 200 C | 71.4 (10000 cycles) at 50 C |
| Na <sub>2</sub> FeP <sub>2</sub> O <sub>7</sub> <sup>4</sup>                                                                                                              |                                         |                                   |                             |
| Na <sub>4</sub> Fe <sub>2.91</sub> Mg <sub>0.03</sub> Cu <sub>0.03</sub> Cr <sub>0.03</sub> (PO <sub>4</sub> ) <sub>2</sub> P <sub>2</sub> O <sub>7</sub> /C <sup>5</sup> | ~ 2.4                                   | 72.4 mAh·g <sup>-1</sup> at 50 C  | 79.1 (10000 cycles) at 10 C |
| Na <sub>4</sub> Fe <sub>3</sub> (PO <sub>4</sub> ) <sub>2</sub> P <sub>2</sub> O <sub>7</sub> <sup>6</sup>                                                                | ~ 1.5                                   | 87 mAh·g <sup>-1</sup> at 50 C    | 81.7 (10000 cycles) at 50 C |
| Na <sub>4</sub> Fe <sub>3</sub> (PO <sub>4</sub> ) <sub>2</sub> P <sub>2</sub> O <sub>7</sub> <sup>—</sup>                                                                | 1.8~ 2                                  | 91.4 mAh·g <sup>-1</sup> at 10 C  | 77.8 (8000 cycles) at 10 C  |
| Na <sub>2</sub> FeP <sub>2</sub> O <sub>7</sub> <sup>7</sup>                                                                                                              |                                         |                                   |                             |
| Na <sub>5</sub> Fe <sub>2.9</sub> Ni <sub>0.1</sub> (PO <sub>4</sub> ) <sub>2</sub> P <sub>2</sub> O <sub>7</sub> <sup>8</sup>                                            | /                                       | 87.1 mAh·g <sup>-1</sup> at 10 C  | 95 (2000 cycles) at 10 C    |
| NFPP/CD <sup>9</sup>                                                                                                                                                      | ~ 2.1                                   | 81.9 mAh·g <sup>-1</sup> at 50 C  | 84.4 (6000 cycles) at 20 C  |
| Na <sub>4</sub> Fe <sub>2.7</sub> Co <sub>0.3</sub> (PO <sub>4</sub> ) <sub>2</sub> P <sub>2</sub> O <sub>7</sub> <sup>10</sup>                                           | ~1.25                                   | 82.3 mAh·g <sup>-1</sup> at 100 C | 85.6 (5000 cycles) at 10 C  |
| Na <sub>4</sub> Fe <sub>3</sub> (PO <sub>4</sub> ) <sub>2</sub> P <sub>2</sub> O <sub>7</sub> <sup>11</sup>                                                               | ~ 2                                     | 78 mAh·g <sup>-1</sup> at 20 C    | 76.8 (10000 cycles) at 20 C |
| Na <sub>3.6</sub> Fe <sub>2.6</sub> V <sub>0.4</sub> (PO <sub>4</sub> ) <sub>2</sub> P <sub>2</sub> O <sub>7</sub> <sup>12</sup>                                          | 1~2                                     | 80.6 mAh·g <sup>-1</sup> at 50 C  | 91.3 (11000 cycles) at 30 C |
| Na <sub>4</sub> Fe <sub>2.86</sub> (PO <sub>4</sub> ) <sub>2</sub> P <sub>2</sub> O <sub>7</sub> <sup>this</sup>                                                          | ~2.7                                    | 74.3 mAh·g <sup>-1</sup> at 50 C  | 88.7 (6800 cycles) at 50 C  |

## References

1. Y. Cao, X. Xie, Z. Yang, D. Liu, J. Wang, Y. Ma, W. Huang, J. Qin, J. Wang, W. Li and X. Li, *J. Colloid Interface Sci.*, 2025, **703**, 139086.
2. W. Ren, M. Qin, Y. Zhou, H. Zhou, J. Zhu, J. Pan, J. Zhou, X. Cao and S. Liang, *Energy Storage Mater.*, 2023, **54**, 776-783.
3. X. Qi, H. Dong, H. Yan, B. Hou, H. Liu, N. Shang, L. Wang, J. Song, S. Chen, S. Chou and X. Zhao, *Angew. Chem., Int. Ed. Engl.*, 2024, **63**, 202410590.
4. Z. L. Hao, J. Z. Guo, M. Du, X. R. Zhang, Y. L. Heng, Z. Y. Gu, X. T. Wang, X. X. Zhao, N. Yu, Z. H. Xue, S. H. Zheng, B. Li and X. L. Wu, *J. Am. Chem. Soc.*, 2025, **147**, 13905-13914.
5. Q. Lu, T. Shen, Y. Zeng, Y. Zhou, M. Su, Z. Sun, L. Liu, A. Jiang, Y. Wan, Y. Liu and R. Wang, *Adv. Funct. Mater.*, 2025, **35**, 09628.
6. Y. Shao, C. Liu, H. Fan, B. Zhang, L. Liao, A. Zhao, X. Li, P. Chu and Y. Cao, *Small*, 2025, **21**, 2504847.
7. X. Wang, H. Li, X. Ge, L. He, S. Li, Y. Zhang, J. Gu, W. Zhou, Y. Lai and Z. Zhang, *Energy Storage Mater.*, 2025, **79**, 104308.
8. X. Yang, Z. Liu, L. Shi, G. Zhang, J. Liu, H. Huo, B. Qu, S. Lou, L. Zhang and Y. Ma, *Small*, 2025, **21**, 2504863.
9. L. Zhang, R. Sun, Y. Liang, X. Wang, J. Liu, Q. Ning, Q. Yuan, H. He, S. Qiu, Y. Ren, J. Xu and X. Yin, *Energy Storage Mater.*, 2025, **81**, 104548.
10. C. Yang, Y. Ren, B. Wang, H. Luo, W. Liu, Q. Yang, Z. Li, X. Kong, Y. Yao, Y. Yu and D. Zhang, *Advanced Energy Materials*, 2026, **0**, 70907.
11. Q. Xia, L. Zhang, D. Wang, J. Wang, Z. Xu, Y. Zhang, Z. Yao, Y. Guo, P. Jia, L. Zhang and Y. Yang, *Energy Storage Materials*, 2026, **84**, 104849.
12. W. Song, N. Chen, J. Wang, W. Hua, B. Zhang, S. Zhao, X. Ming, Z. Shen, G. Chen and F. Du, *J Am Chem Soc*, 2025, **147**, 39151-39159.
